# Supplementary material
Source: publisher figshare collection journal article supplement (https://geolsoc.figshare.com/articles/dataset/_/3453728)
Supplement: Supplementary file 1 [file 1]

**Supplementary Material 3.** *Typical instrument, Agilent 7700x, operating conditions for LA-ICP-MS dating of detrital zircons*

---

Agilent 7700x

---

|                 |                          |
|-----------------|--------------------------|
| Forward power   | 1300 W                   |
| Reflected power | 2 W                      |
| Sample depth    | 3 mm                     |
| Dwell time      | 0.01 s                   |
| Carrier gas     | 0.89 l min <sup>-1</sup> |

---

Helex laser ablation system

---

|                                      |                          |
|--------------------------------------|--------------------------|
| Lambda Physik Compex 110 ArF excimer | 193 nm                   |
| Laser fluence                        | ~ 5 J cm <sup>-2</sup>   |
| Spot size                            | 33 μm                    |
| Repetition rate                      | 5 Hz                     |
| He gas to cell                       | 500 ml min <sup>-1</sup> |

---
