# Supplementary material
Source: publisher figshare collection journal article supplement (https://geolsoc.figshare.com/articles/dataset/_/3453728)
Supplement: Supplementary file 2 [file 1]

**Supplementary Material 2.** *Summary of the post-volcanic Cretaceous to Eocene sedimentary units in Hong Kong (after Lai et al. 1996; Sewell et al. 2000 and references therein)*

| Rock unit              | Main lithology                                                                                                                                       | Field relationship                                                                                                | Preserved thickness (m) | Stratigraphic age | Samples                       |
|------------------------|------------------------------------------------------------------------------------------------------------------------------------------------------|-------------------------------------------------------------------------------------------------------------------|-------------------------|-------------------|-------------------------------|
| Pat Sin Leng Formation | Thickly-bedded conglomerate, tuffaceous sandstone and thinly-bedded siltstone                                                                        | Deposited on 164 Ma volcanic strata; dipping variably at 20-45° to N and NE; areal coverage of 30 km <sup>2</sup> | 500                     | Cretaceous        | HK13327<br>HK13334<br>HK13343 |
| Port Island Formation  | Thickly-bedded conglomerate and siltstone, interbedded with thinly-bedded siltstone                                                                  | Deposited on 143 Ma volcanic strata; dipping variably at 20-40° to E and SE;                                      | 300                     | Cretaceous        | HK13329                       |
| Kat O Formation        | Calcareous tuffaceous breccias, conglomerate and coarse-grained sandstone, with granitic clast-bearing breccias and sandstone in an offshore outcrop | Deposited on 143 Ma volcanic strata; dipping at 5-10° to N                                                        | 100                     | Cretaceous        | HK13325<br>HK13326<br>HK13743 |
| Ping Chau Formation    | Thinly-bedded dolomitic and calcareous siltstones, locally aegirine- and / or zeolite-bearing with rare cherty interbeds                             | Base of formation not exposed; dipping at 10-20 ° to NE                                                           | 450                     | Eocene            | HK13322<br>HK13323            |
