# Supplementary material
Source: publisher figshare collection journal article supplement (https://geolsoc.figshare.com/articles/dataset/_/3453728)
Supplement: Supplementary file 3 [file 1]

**Supplementary Material 1.** *Summary of the four Mesozoic volcanic-plutonic assemblages and their main lithologies (after Sewell et al. 2000)*

| Magmatic Episode, Age (Ma) | Volcanic Group              |                                                              |                                                                | Granitic Suite    |                                      |                                          |
|----------------------------|-----------------------------|--------------------------------------------------------------|----------------------------------------------------------------|-------------------|--------------------------------------|------------------------------------------|
|                            | Name                        | Main lithology                                               | Samples                                                        | Name              | Main lithology                       | Samples                                  |
| 1. 164-160                 | Tsuen Wan Volcanic Group    | Rhyodacitic ash tuff, dacitic lava, and tuff breccias        | HK11821<br>HK11837<br>HK12025<br>HK12026<br>HK13339            | Lamma Suite       | Granite and granodiorite             | HK8754                                   |
| 2. 148-146                 | Lantau Volcanic Group       | Rhyolitic vitric tuff and lava, with tuffaceous sediments    | HK13330<br>HK13332                                             | Kwai Chung Suite  | Granite and rhyolitic porphyry dykes | HK11831<br>HK11839<br>HK12003<br>HK13278 |
| 3. 143                     | Repulse Bay Volcanic Group  | Rhyolitic to trachytic ash tuff, with tuffaceous sediments   | HK11832<br>HK11835<br>HK11836<br>HK11840<br>HK12076<br>HK13275 | Cheung Chau Suite | Granite and quartz monzonite         | HK8353                                   |
| 4. 141-140                 | Kau Sai Chau Volcanic Group | Rhyolitic vitric tuff, rhyolitic lava and trachydacitic lava | HK12001<br>HK13277                                             | Lion Rock Suite   | Granite and quartz monzonite         | HK8758<br>HK11042<br>HK12022<br>HK12023  |
